# Supplementary material
Source: PubMed Central journal article supplement (PMC10519111)

**Supplementary Figure 1: Receiver operating curves for (i) PRS<sub>CD</sub>, and (ii) PRS<sub>UC</sub>, respectively in UK Biobank (Testing)**

**(i) PRS<sub>CD</sub>**

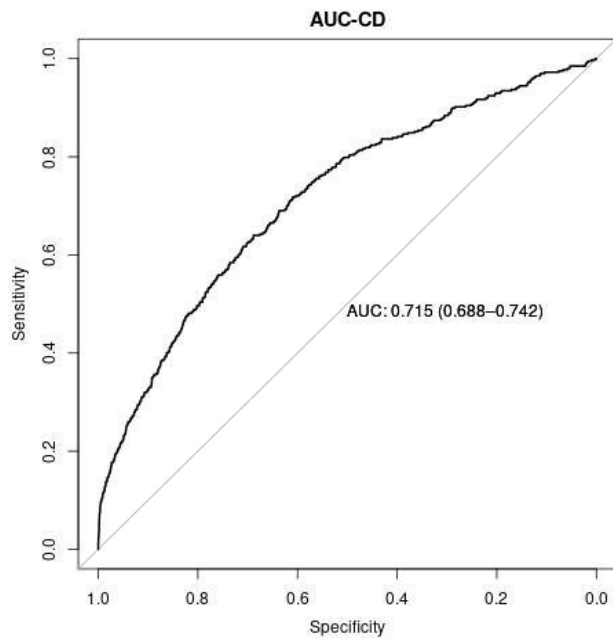

**(ii) PRS<sub>UC</sub>**

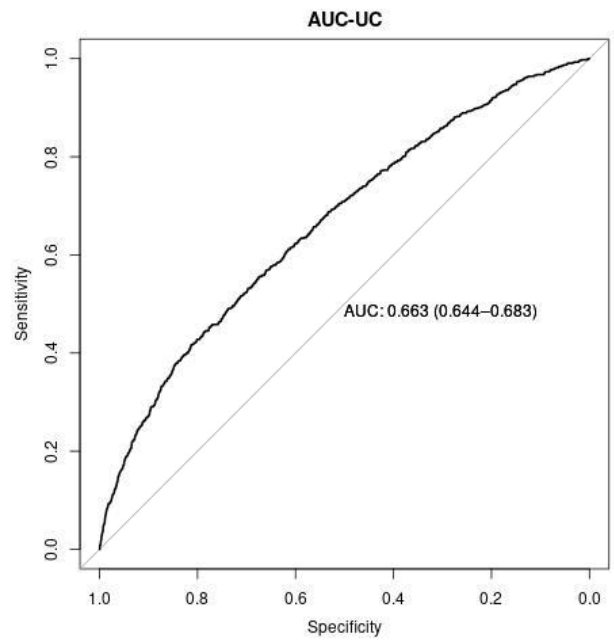

**Supplementary Figure 2: Receiver operating curves for (i) PRS<sub>CD</sub>, and (ii) PRS<sub>UC</sub>, respectively in BioVU (Validation cohort)**

**(i) PRS<sub>CD</sub>**

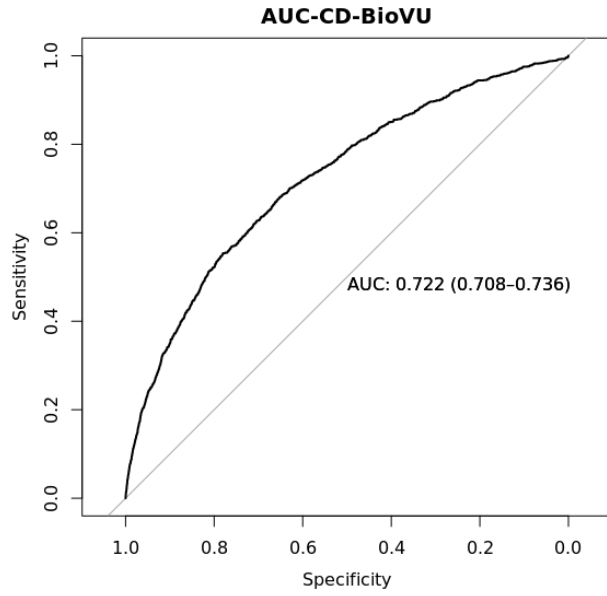

**(ii) PRS<sub>UC</sub>**

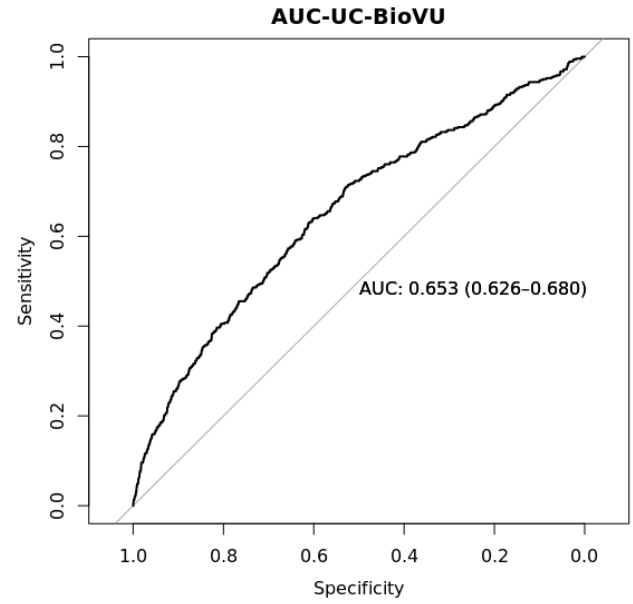

**Supplementary Figure 3: Differences in the mean PRS<sub>UC</sub> by immune checkpoint inhibitor-mediated colitis (All-grade and severe) in the GeRI cohort**

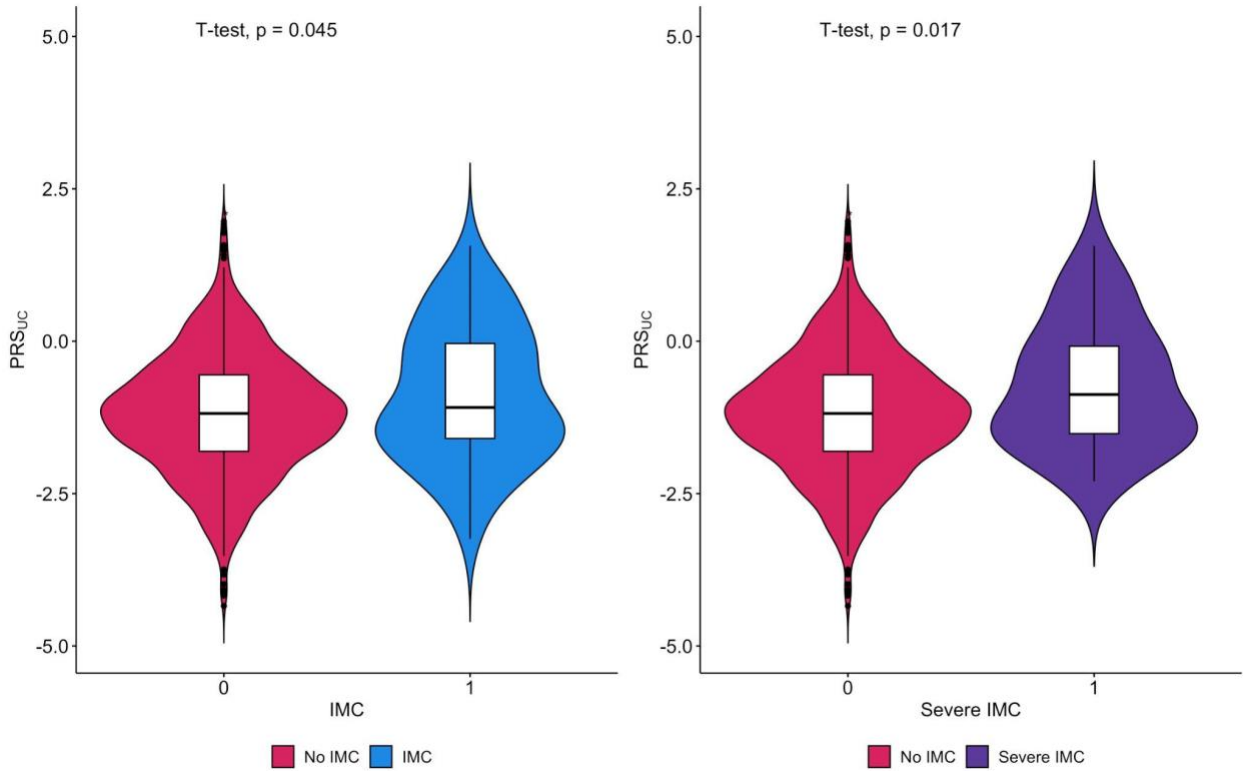

Supplementary Figure 4: Associations of known ulcerative colitis-associated HLA markers (frequency  $\geq 0.01$ ) with all-grade immune checkpoint inhibitor-mediated colitis in the GeRI cohort.

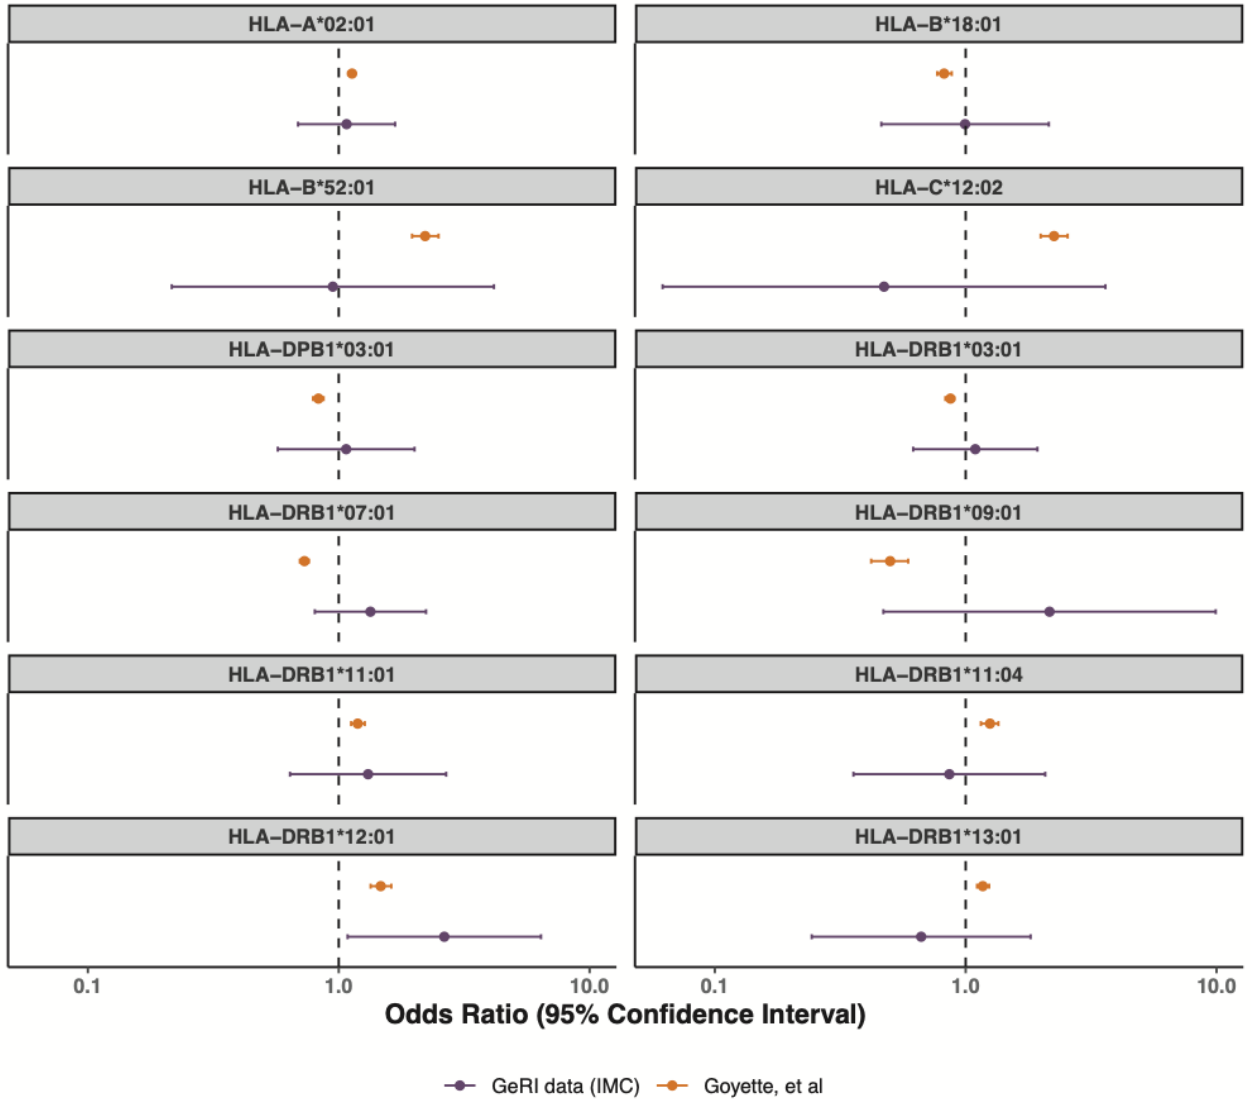

**Supplementary Figure 5: Immune checkpoint inhibitor-mediated colitis (IMC) as a predictor of progression-free survival (PFS) in the GeRI cohort (i) All-grade IMC, (iii) Severe IMC. Kaplan–Meier survival curves are unadjusted and compare those who had an IMC (all-grade or severe) with those who did not have an IMC (No IMC). The p-values in the graph represent the log-rank p-values and the dotted line represents median survival time. Graphs are cox proportional hazards models with 90-day landmark.**

(ii) All-grade IMC (Landmark analysis)

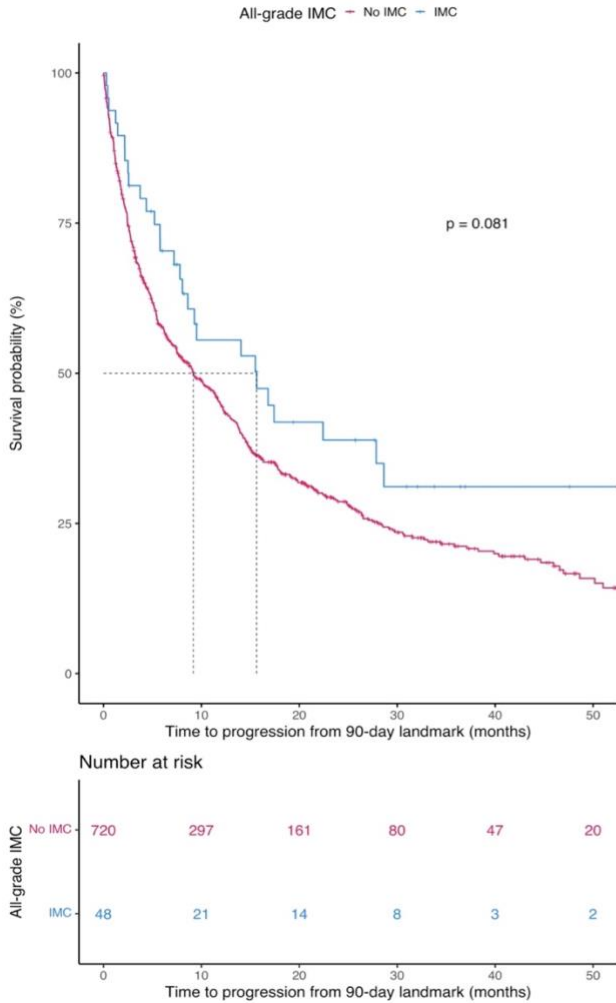

(iv) Severe IMC (Landmark analysis)

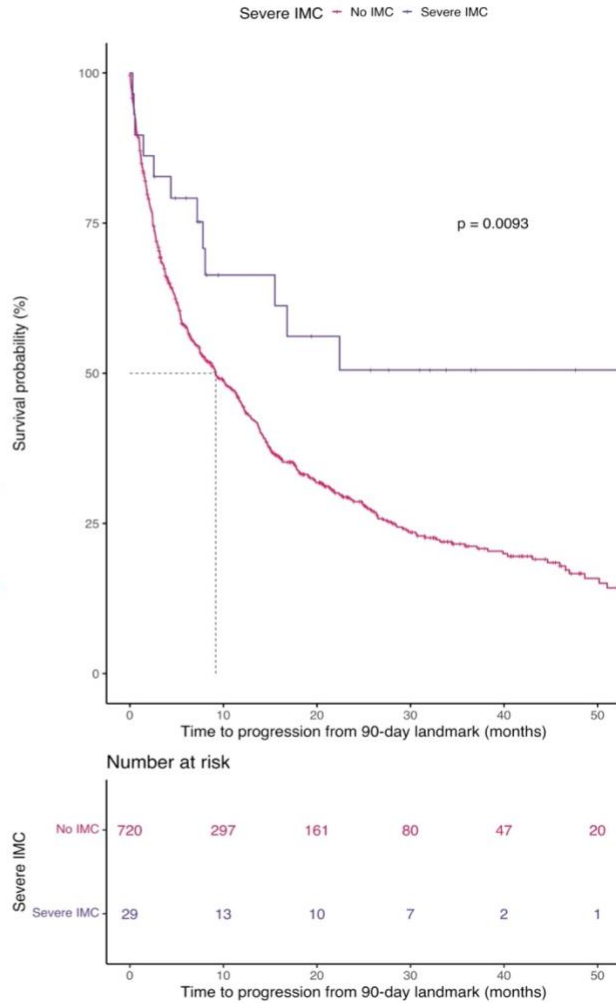

Supplement: media-1.pdf [file media-1.pdf]
